# Supplementary material for: Vaginal colonization and vertical transmission of Candida species: prevalence and associated factors among pregnant women and their neonates at public health facilities of Northeast Ethiopia
Source: PubMed Central journal article supplement — BMC Pregnancy Childbirth. 2025 Jan 9;25:22. doi: 10.1186/s12884-024-07103-9 (PMC11716415; doi:10.1186/s12884-024-07103-9), 2025-01-09
Supplement: 12884_2024_7103_MOESM1_ESM.pdf [file 12884_2024_7103_MOESM1_ESM.pdf]

**Bahir Dar University**  
**School of Medicine and Health Science**  
**Department of Medical Laboratory Science**

**Information sheet, consent and assent form for parents of newborn**

You are invited to let your child participate in this study. The aim of this study is to determine the rate of vertical transmission of Candida species at public health facilities of Dessie city and to give recommendation to concerned bodies so as to take appropriate measures to prevent this disease. Currently recto-vaginal colonizing candida species cause's diseases for neonates as different studies indicate in different parts of the world.

**Purpose:** the purpose of this study is to determine rate of vertical transmission of Candida species to newborns.

**Procedure to be carried out:** the procedure is easy and simple; ear, nasal and umbilical swab sample will be collected by attending midwives. All samples will be transported to Laboratory for analysis.

**Risk and discomfort:** There will be no discomfort during collection of samples since samples are taken from external surface of the newborn.

**Expected benefits:** The information gained from yours and others child will help to consider prevention strategy for vertical transmission and neonatal disease caused by Candida species in Ethiopia, if your baby is positive for Candida appropriate medical care will be provided to him.

**Confidentiality:** We respect your child privacy and confidentiality. Any information that identifies your child will not be shared with anyone else outside the study team. If a research article or publication comes from this study, your child will not be identified by name. The information we collect from your child as part of the study will be kept in a locked file cabinet, or be protected by a password on the computer only accessible to personnel involved in the study.

**Voluntary Participation and Withdrawal from the Study:** The participation is completely voluntary and you have the right not to late your child to participate in this study. You can stop your child participating in the study at any time after giving your consent. This decision will not

affect in any way yours or your child current or future medical care in the health facility. Contact information: If you have any questions about this study, you can contact the investigator with the following address. Getnet Shimeles: Tel; 0912909124

Name of study participant: \_\_\_\_\_ I have been requested to let my child and myself to participate in this study which involves collection of specimens from my child. The purpose of the study and sample collection procedure has been explained to me. I have also read the information sheet (or it has been read to me); I have understood that this study is about Candida species vaginal Colonization and vertical transmission rate, which is the cause of morbidity and mortality among newborn in the world. I have asked some questions and clarification has been given to me. I have given my consent on behalf of my child to let him participate in the study and I hereby confirm my agreement with my signature. Date -----  
Signature-----

Bahir Dar University  
 School of Medicine and health science  
 Department of medical laboratory science

**Questionnaire**

1. CODE -----
2. Data collection site (Name of health facility): -----
3. Data collection date-----
4. Interviewer Name: -----Signature -----Date: -----
5. Participant code ----- 5. Participant card no -----

**Part-I Socio-demographic data collection Questionnaire**

| S. no | Questions                             | Answer                                                                                             | Code                       |
|-------|---------------------------------------|----------------------------------------------------------------------------------------------------|----------------------------|
| 101   | Age (in years)                        | -----                                                                                              |                            |
| 102   | Where is your residence               | Urban<br>Rural                                                                                     | 1<br>2                     |
| 103   | What is your marital status           | Single<br>Married<br>Divorced<br>Widowed                                                           | 1<br>2<br>3<br>4           |
| 104   | What is your educational status       | Unable to read and write<br>Elementary (1-8)<br>Secondary (9-12)<br>High grade (college and above) | 1<br>2<br>3<br>4           |
| 105   | What is your occupation               | Civil servant<br>Student<br>Farmer<br>House wife<br>Merchant<br>Daily labor                        | 1<br>2<br>3<br>4<br>5<br>6 |
| 106   | Source of drinking water              | Public tap water<br>Spring tape water<br>Private                                                   | 1<br>2<br>3                |
| 107   | Is there domestic animal in the house | Yes<br>No                                                                                          | 1<br>2                     |

**Part 2 - Obstetrics-Relate data collection questioners**

| S. no | Questions                                                 | Answer             | Code |
|-------|-----------------------------------------------------------|--------------------|------|
| 201   | Gestational age                                           | -----              |      |
| 202   | Number of ANC visits during the current pregnancy         | -----              |      |
| 203   | History of antibiotic use during the current pregnancy    | Yes                | 1    |
|       |                                                           | No                 | 2    |
| 204   | Current Gestational DM                                    | Yes                | 1    |
|       |                                                           | No                 | 2    |
| 205   | Current Gestational hypertension                          | Yes                | 1    |
|       |                                                           | No                 | 2    |
| 206   | Type of gravida                                           | Primigravida       | 1    |
|       |                                                           | Multigravida       | 2    |
| 207   | History of abortion                                       | Yes                | 1    |
|       |                                                           | No                 | 2    |
| 208   | History of still birth                                    | Yes                | 1    |
|       |                                                           | No                 | 2    |
| 209   | Rupture of membrane 1 h. before the start of labor (PROM) | Yes                | 1    |
|       |                                                           | No                 | 2    |
| 210   | Duration of labor                                         | -----              |      |
| 211   | Fever during labor                                        | Yes                | 1    |
|       |                                                           | No                 | 2    |
| 212   | Meconium stained amniotic fluid                           | Yes                | 1    |
|       |                                                           | No                 | 2    |
| 213   | Sex of newborn                                            | Male               | 1    |
|       |                                                           | Female             | 2    |
| 214   | Birth weight in gram                                      | -----              |      |
| 215   | Status of newborn                                         | Alive              | 1    |
|       |                                                           | Dead (still birth) | 2    |
| 216   | APGAR score at 5 <sup>th</sup> minutes                    | <7                 | 1    |

|  |  |      |   |
|--|--|------|---|
|  |  | 7-10 | 2 |
|--|--|------|---|

**Part 3 - Clinical Characteristics data collection questioners**

| <b>S. no</b> | <b>Questions</b>                                | <b>Answer</b>                   | <b>Code</b> |
|--------------|-------------------------------------------------|---------------------------------|-------------|
| 301          | History of hospitalization in the past 3 months | Yes<br>No                       | 1<br>2      |
| 302          | HIV status                                      | Positive<br>Negative<br>Unknown | 1<br>2<br>3 |
| 303          | Syphilis status                                 | Reactive<br>Non-reactive        | 1<br>2      |
| 304          | History of UTI at Current pregnancy             | Present<br>Not present          | 1<br>2      |
| 305          | Vaginal discharge                               | Present<br>Not present          | 1<br>2      |
| 306          | History of STI at current pregnancy             | Yes<br>No                       | 1<br>2      |
